# Supplementary material for: Bonding of thermoplastic microfluidics by using dry adhesive tape
Source: Royal Society of Chemistry journal article supplement (doi:10.1039/d0ra05876a), 2020-01-01
Supplement: d0ra05876a1.pdf [file d0ra05876a1.pdf]

## Supplementary Information

### **Bonding of thermoplastic microfluidics by using dry adhesive tape**

Chia-Wen Tsao\* and Wan-Ci Syu

Department of Mechanical Engineering, National Central University, Taoyuan, Taiwan

\*Contact

Chia-Wen Tsao

E-mail: [cwtsao@ncu.edu.tw](mailto:cwtsao@ncu.edu.tw)

Tel: +886-3-4267343

Fax: +886-3-4254501

### S1.1 Water Contact Angle Measurement

The surface contact angles were measured by contact angle measurement system (OCA 15EC, DataPhysics Instruments GmbH, Filderstadt, Germany). A 3 $\mu$ L droplet (dosing rate 1 $\mu$ l/sec) was auto-pipetted on the thermoplastic substrate to obtain the contact angle data. The water contact angle of 30, 60, and 80  $\mu$ m 8000 series 3M double-side tapes were measured 86.59 $\pm$ 9.85, 105.23 $\pm$ 2.79, and 99.02 $\pm$ 5.28, based on 8 individual measurements (Fig. S1).

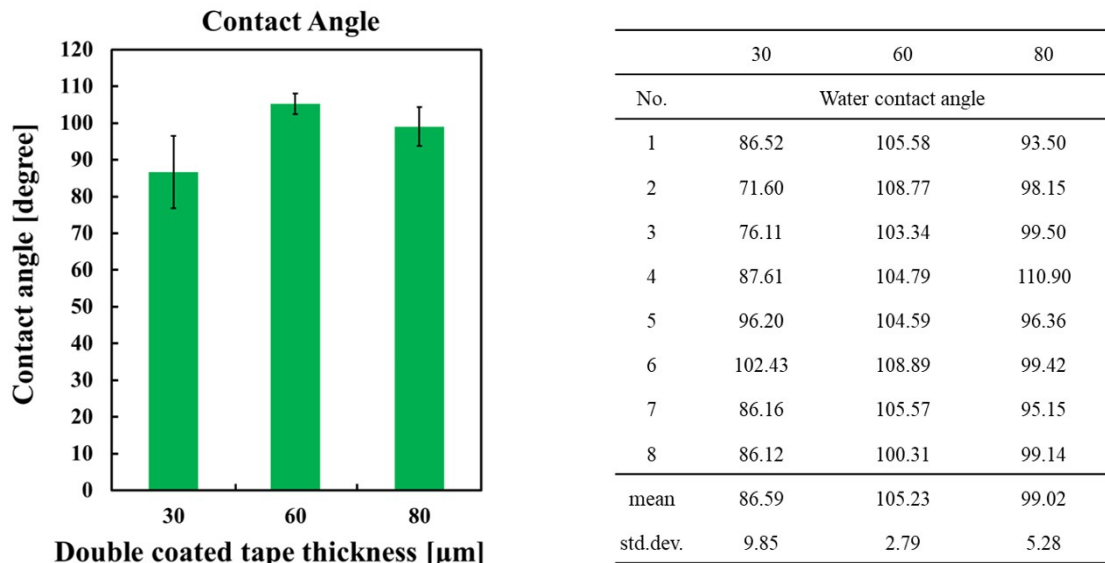

Fig. S1 The water contact angle of 30, 60, and 80  $\mu$ m 8000 series 3M double-side tapes. Error bars obtained from 8 individual measurements

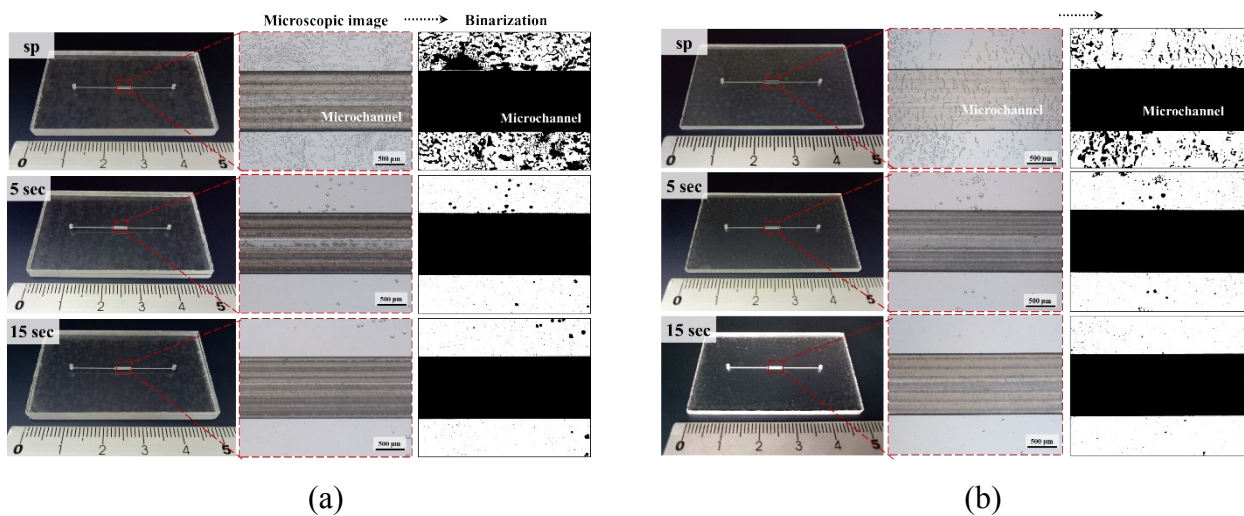

Fig. S2 Images of microchannel bonding interface on a (a) 2 mm thick inflexible and (b) 0.25 mm flexible substrate cover substrate with scraper-press (sp), 5 and 15 seconds. Dry adhesive tape thickness: 30  $\mu$ m, Pressure: 1.05 kg/cm<sup>2</sup>

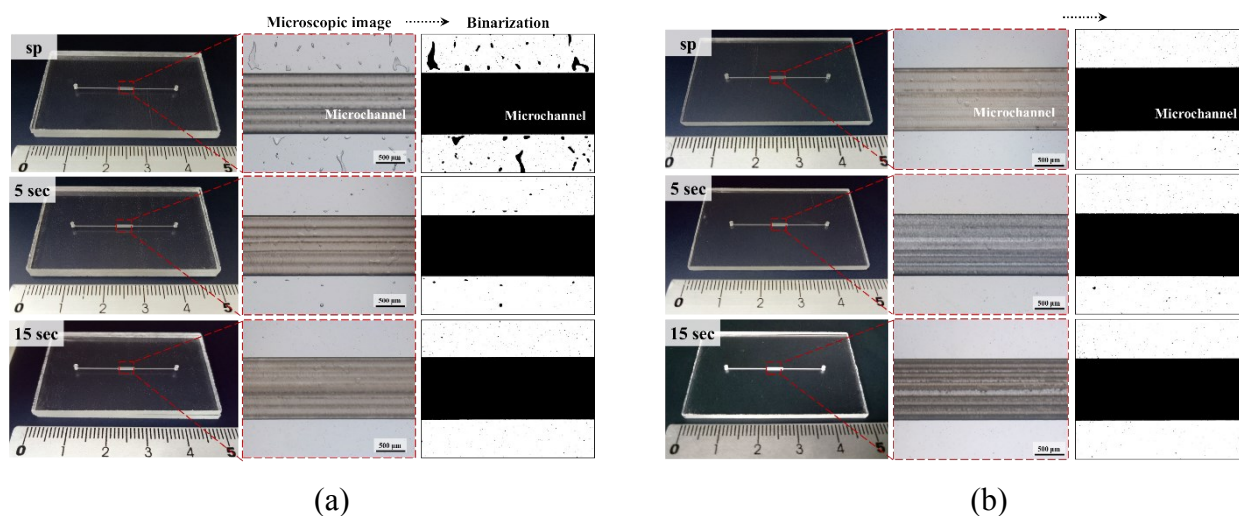

Fig S3 Images of microchannel bonding interface on a (a) 2 mm thick inflexible and (b) 0.25 flexible substrate cover substrate with scraper-press (sp), 5 and 15 seconds. Dry adhesive tape thickness: 80 µm, Pressure:1.05 kg/cm<sup>2</sup>

Table 1.1 Summarized of the bubble ratio and leak pressure of the dry adhesive bonded microfluidic device under different process conditions

| Thickness | Bonding conditions | Inflexible Substrate |                     | Flexible substrate |                     |
|-----------|--------------------|----------------------|---------------------|--------------------|---------------------|
|           |                    | Bubble ratio [%]     | Leak pressure [bar] | Bubble ratio [%]   | Leak pressure [bar] |
| 30 µm     | sp                 | 28.75 ± 6.77         | 8.14 ± 0.12         | 14.74 ± 2.65       | 3.64 ± 0.27         |
|           | 5s                 | 2.15 ± 0.70          | 10.34 ± 1.00        | 1.59 ± 0.87        | 4.59 ± 0.39         |
|           | 15s                | 1.72 ± 1.09          | 10.96 ± 1.16        | 0.55 ± 0.12        | 4.98 ± 0.09         |
| 60 µm     | sp                 | 8.44 ± 3.27          | 9.19 ± 0.76         | 2.36 ± 0.95        | 2.96 ± 0.20         |
|           | 5s                 | 0.70 ± 0.11          | 10.45 ± 0.89        | 0.36 ± 0.06        | 3.58 ± 0.40         |
|           | 15s                | 0.47 ± 0.18          | 11.26 ± 1.49        | 0.25 ± 0.06        | 3.93 ± 0.36         |
| 80 µm     | sp                 | 4.84 ± 1.46          | 5.85 ± 0.53         | 0.47 ± 0.07        | 2.07 ± 0.22         |
|           | 5s                 | 0.89 ± 0.39          | 7.53 ± 0.36         | 0.27 ± 0.07        | 2.40 ± 0.28         |
|           | 15s                | 0.76 ± 0.41          | 7.39 ± 0.98         | 0.19 ± 0.02        | 2.39 ± 0.11         |
